# Supplementary material for: Associations of substance use, psychosis, and mortality among people living in precarious housing or homelessness: A longitudinal, community-based study in Vancouver, Canada
Source: PubMed Central journal article supplement (PMC7337288; doi:10.1371/journal.pmed.1003172), 2020-07-06
Supplement: pmed.1003172.s002.pdf [file pmed.1003172.s002.pdf]

**S1 Table. Demographics in studies of precariously housed and homeless participants in Vancouver, Canada.**

| Measure                                       | Hotel study participants at baseline N=437                                    | Lewis et al. [1] N=628           | Shannon et al. [2] N=1813 | Palepu et al. [3] N=396                                                                                                                                                                                                                   |
|-----------------------------------------------|-------------------------------------------------------------------------------|----------------------------------|---------------------------|-------------------------------------------------------------------------------------------------------------------------------------------------------------------------------------------------------------------------------------------|
| Sampling                                      | Community-based (all consenting tenants) at SROs and Downtown Community Court | Stratified random sample of SROs | Facility-based at SROs    | Randomly selected participants from 10 SROs or rooming houses (due to difficulties with access, modified to include meal programs, community health centres, drop-in centres); for homeless, randomly selected shelters and meal programs |
| Age (years)                                   | 40.6 (mean) SD 11.2                                                           | 46 (mean)                        | 42 (median)               | 42.0 (mean) SD 10.2                                                                                                                                                                                                                       |
| Sex (Male)                                    | 340/437 (78%)                                                                 | 496/628 (79%)                    | 1375/1800 (76%)           | 244/393 (62%)                                                                                                                                                                                                                             |
| White                                         | 261/437 (60%)                                                                 | 426/628 (68%)                    |                           | 222/383 (58%)                                                                                                                                                                                                                             |
| Indigenous                                    | 113/437 (26%)                                                                 | 105/628 (17%)                    | 498/1813 (28%)*           | 105/383 (27%)                                                                                                                                                                                                                             |
| Mixed/Other                                   | 63/437 (14%)                                                                  | 97/628 (15%)                     |                           | 56/383 (15%)                                                                                                                                                                                                                              |
| Average monthly income, CAD                   | \$875 (median) n=425                                                          | \$1109 (mean)                    |                           | \$1074 (median)                                                                                                                                                                                                                           |
| Previous homelessness                         | 323/431 (75%)                                                                 | 327/628 (52%)                    | 512/1812 (28%) †          |                                                                                                                                                                                                                                           |
| <b>Education</b>                              |                                                                               |                                  |                           |                                                                                                                                                                                                                                           |
| 0-8 years                                     | 52/432 (12%)                                                                  | 69/628 (11%)                     |                           |                                                                                                                                                                                                                                           |
| 8-11 years                                    | 145/432 (55%)                                                                 | 276/628 (44%)                    |                           | 178/391 (46%)                                                                                                                                                                                                                             |
| 12 years                                      | 103/432 (24%)                                                                 | 138/628 (22%)                    |                           | 99/391 (25%)                                                                                                                                                                                                                              |
| >12 years                                     | 132/432 (31%)                                                                 | 138/628 (22%)                    |                           | 114/391 (29%)                                                                                                                                                                                                                             |
| Active Smoker                                 | 2394/414 (95%)                                                                | 481/628 (77%)                    |                           |                                                                                                                                                                                                                                           |
| Injection drug use in past 1-6 months         | 256/426 (60%)                                                                 |                                  | 718/1813 (40%)            |                                                                                                                                                                                                                                           |
| Current alcohol dependence or problematic use | 81/437 (19%)                                                                  | 126/628 (20%)                    |                           | 60/396 (15%)                                                                                                                                                                                                                              |
| HIV status                                    | 65/409 (16%)                                                                  |                                  | 462/1813 (26%)            |                                                                                                                                                                                                                                           |
| Previous HCV infection                        | 257/409 (63%)                                                                 |                                  | 868/1813 (48%)            |                                                                                                                                                                                                                                           |

SRO: single room occupancy hotel, SD: standard deviation, CAD: Canadian dollars,

\*Indigenous versus non-Indigenous only reported

†Past 6 months only

1. Lewis M, Boyes K, McClanaghan D, Copas J. Downtown Eastside Demographic Study of SRO and Social Housing Tenants. City of Vancouver, Vancouver, 2008, pp 1-102.
2. Shannon K, Ishida T, Lai C, Tyndall MW. The impact of unregulated single room occupancy hotels on the health status of illicit drug users in Vancouver. *Int J Drug Policy* 2006;17:107-114.
3. Palepu A, Gadermann A, Hubble AM et al. Substance use and access to health care and addiction treatment among homeless and vulnerably housed persons in three Canadian cities. *PLoS One* 2013;8(10);e75133.
