# Supplementary material for: Associations of substance use, psychosis, and mortality among people living in precarious housing or homelessness: A longitudinal, community-based study in Vancouver, Canada
Source: PubMed Central journal article supplement (PMC7337288; doi:10.1371/journal.pmed.1003172), 2020-07-06
Supplement: pmed.1003172.s003.pdf [file pmed.1003172.s003.pdf]

**S2 Table. Demographics in cross-Canada studies of precariously housed and homeless participants.**

| Measure                    | Hotel study participants at baseline                                          | Health and Housing in Transition Study [1,2]                                                                                                                                                                                              |                     |                    |                     |
|----------------------------|-------------------------------------------------------------------------------|-------------------------------------------------------------------------------------------------------------------------------------------------------------------------------------------------------------------------------------------|---------------------|--------------------|---------------------|
|                            |                                                                               | Vancouver, Toronto, Ottawa<br>N=1192                                                                                                                                                                                                      | Vancouver<br>N=396  | Toronto<br>N=399   | Ottawa<br>N=396     |
| Sampling                   | Community-based (all consenting tenants) at SROs and Downtown Community Court | Randomly selected participants from 10 SROs or rooming houses (due to difficulties with access, modified to include meal programs, community health centres, drop-in centres); for homeless, randomly selected shelters and meal programs |                     |                    |                     |
| Age (years)                | 40.6 (mean) SD 11.2                                                           | (values presented as groups rather than mean)                                                                                                                                                                                             | 42.0 (mean) SD 10.2 | 43.5 (mean) SD 9.9 | 41.1 (mean) SD 11.4 |
| Sex (Male)                 | 340/437 (78%)                                                                 | 781/1188 (66%)                                                                                                                                                                                                                            | 244/393 (62%)       | 258/399 (65%)      | 278/395 (70%)       |
| White                      | 261/437 (60%)                                                                 | 722/1156 (62%)                                                                                                                                                                                                                            | 222/383 (58%)       | 203/379 (54%)      | 297/393 (76%)       |
| Indigenous                 | 113/437 (26%)                                                                 | 205/1156 (18%)                                                                                                                                                                                                                            | 105/383 (27%)       | 52/379 (14%)       | 47/393 (12%)        |
| Mixed/Other                | 63/437 (14%)                                                                  | 229/1156 (20%)                                                                                                                                                                                                                            | 56/383 (15%)        | 124/379 (33%)      | 49/393 (12%)        |
| <b>Education</b>           |                                                                               |                                                                                                                                                                                                                                           |                     |                    |                     |
| <12 years                  | 197/432 (46%)                                                                 | 529/1183 (45%)                                                                                                                                                                                                                            | 178/391 (46%)       | 170/397 (43%)      | 181/394 (46%)       |
| 12 years                   | 103/432 (24%)                                                                 | 277/1183 (23.4%)                                                                                                                                                                                                                          | 99/391 (25%)        | 90/397 (23%)       | 87/394 (22%)        |
| >12 years                  | 132/432 (31%)                                                                 | 377/1183 (32%)                                                                                                                                                                                                                            | 114/391 (29%)       | 137/397 (34%)      | 126/394 (32%)       |
| Monthly Income, median CAD | \$875, n=425                                                                  | \$900                                                                                                                                                                                                                                     | \$1074              | \$770              | \$825               |

1. Hwang SW, Aubry T, Palepu A et al. The health and housing in transition study: a longitudinal study of the health of homeless and vulnerably housed adults in three Canadian cities. *Int J Public Health* 2011;56:609–623.
2. Palepu A, Gadermann A, Hubley AM et al. Substance use and access to health care and addiction treatment among homeless and vulnerably housed persons in three Canadian cities. *PLOS One* 2013;8(10);e75133.
