# Supplementary material for: Associations of substance use, psychosis, and mortality among people living in precarious housing or homelessness: A longitudinal, community-based study in Vancouver, Canada
Source: PubMed Central journal article supplement (PMC7337288; doi:10.1371/journal.pmed.1003172), 2020-07-06
Supplement: pmed.1003172.s004.pdf [file pmed.1003172.s004.pdf]

**S3 Table. Descriptive values of functional measures at baseline. Mean (SD).**

|                                                                      | Past psychotic disorder diagnosis |                 | Baseline psychotic features |                 |
|----------------------------------------------------------------------|-----------------------------------|-----------------|-----------------------------|-----------------|
|                                                                      | Present<br>n=259                  | Absent<br>n=164 | Present<br>n=223            | Absent<br>n=200 |
| <b>Social and Occupational Functioning Assessment Scale*</b>         | 38.3 (9.9)                        | 42.7 (11.1)     | 37.4 (9.7)                  | 42.9 (10.8)     |
| <b>Role Functioning Scale total score†</b>                           | 11.5 (3.1)                        | 12.6 (3.3)      | 11.2 (3.1)                  | 12.8 (3.2)      |
| <b>Role Functioning Scale Work Productivity</b>                      | 1.7 (1.0)                         | 2.0 (1.3)       | 1.7 (1.0)                   | 2.0 (1.2)       |
| <b>Role Functioning Scale Independent Living / Self Care</b>         | 3.2 (1.0)                         | 3.5 (1.1)       | 3.2 (1.0)                   | 3.6 (1.1)       |
| <b>Role Functioning Scale Immediate Social Network Relationships</b> | 3.5 (1.3)                         | 3.8 (1.3)       | 3.3 (1.3)                   | 4.0 (1.3)       |
| <b>Role Functioning Scale Extended Social Network Relationships</b>  | 3.0 (0.9)                         | 3.2 (0.9)       | 3.0 (0.9)                   | 3.3 (0.9)       |

\*The Social and Occupational Functioning Assessment Scale is rated 0-100 with higher scores representing better functioning.

†The Role Functioning Scale is comprised of four domains (work productivity, independent living, and immediate and extended social network relationships) each rated 1 to 7 with higher scores representing better function. Measures of function were assessed by a research assistant.
