# Supplementary material for: Associations of substance use, psychosis, and mortality among people living in precarious housing or homelessness: A longitudinal, community-based study in Vancouver, Canada
Source: PubMed Central journal article supplement (PMC7337288; doi:10.1371/journal.pmed.1003172), 2020-07-06
Supplement: pmed.1003172.s005.pdf [file pmed.1003172.s005.pdf]

**S4 Table. Relationships between past psychotic disorder diagnosis, baseline psychotic features, and level of function at baseline (n=423).**

|                                                                      | Model 1*      |         | Model 2†      |         | Model 3‡      |         |
|----------------------------------------------------------------------|---------------|---------|---------------|---------|---------------|---------|
|                                                                      | Estimate (SE) | p-value | Estimate (SE) | p-value | Estimate (SE) | p-value |
| <b>Social and Occupational Functioning Assessment Scale</b>          |               |         |               |         |               |         |
| Past psychotic disorder diagnosis                                    | 2.38 (0.53)   | <0.001  |               |         | 1.39 (0.57)   | 0.02    |
| Baseline psychotic features                                          |               |         | 2.84 (0.50)   | <0.001  | 2.28 (0.55)   | <0.001  |
| <b>Role Functioning Scale total score</b>                            |               |         |               |         |               |         |
| Past psychotic disorder diagnosis                                    | 0.65 (0.16)   | <0.001  |               |         | 0.33 (0.17)   | 0.06    |
| Baseline psychotic features                                          |               |         | 0.88 (0.15)   | <0.001  | 0.75 (0.17)   | <0.001  |
| <b>Role Functioning Scale Work Productivity</b>                      |               |         |               |         |               |         |
| Past psychotic disorder diagnosis                                    | 0.17 (0.06)   | 0.003   |               |         | 0.13 (0.06)   | 0.03    |
| Baseline psychotic features                                          |               |         | 0.13 (0.05)   | 0.01    | 0.08 (0.06)   | 0.18    |
| <b>Role Functioning Scale Independent Living / Self-Care</b>         |               |         |               |         |               |         |
| Past psychotic disorder diagnosis                                    | 0.17 (0.05)   | 0.002   |               |         | 0.09 (0.06)   | 0.12    |
| Baseline psychotic features                                          |               |         | 0.23 (0.05)   | <0.001  | 0.190 (0.06)  | <0.001  |
| <b>Role Functioning Scale Immediate Social Network Relationships</b> |               |         |               |         |               |         |
| Past psychotic disorder diagnosis                                    | 0.18 (0.07)   | 0.006   |               |         | 0.04 (0.07)   | 0.58    |
| Baseline psychotic features                                          |               |         | 0.35 (0.06)   | <0.001  | 0.33 (0.07)   | <0.001  |
| <b>Role Functioning Scale Extended Social Network Relationships</b>  |               |         |               |         |               |         |
| Past psychotic disorder diagnosis                                    | 0.13 (0.04)   | 0.004   |               |         | 0.06 (0.05)   | 0.18    |
| Baseline psychotic features                                          |               |         | 0.17 (0.04)   | <0.001  | 0.15 (0.05)   | 0.002   |

\*Model 1 estimates the relationship between past psychotic disorder diagnosis and each functional outcome at baseline, controlling for age and sex.

†Model 2 estimates the relationship between baseline psychotic features and each functional outcome at baseline, controlling for age and sex.

‡Model 3 includes the effects of both past psychotic disorder and baseline psychotic features, controlling for age and sex.
