# Supplementary material for: Associations of substance use, psychosis, and mortality among people living in precarious housing or homelessness: A longitudinal, community-based study in Vancouver, Canada
Source: PubMed Central journal article supplement (PMC7337288; doi:10.1371/journal.pmed.1003172), 2020-07-06
Supplement: pmed.1003172.s006.pdf [file pmed.1003172.s006.pdf]

**S5 Table. Lagged effects of time-varying risk factors (the week prior to psychosis assessment week) on odds of observing psychotic features during the first year after entering the study.**

|                                                                                | Unadjusted |                    |         | Adjusted*<br>(n=409, 3625 observations) |         |
|--------------------------------------------------------------------------------|------------|--------------------|---------|-----------------------------------------|---------|
|                                                                                | n, obs     | OR (95% CI)        | P-Value | OR (95% CI)                             | P-Value |
| <b>Covariates</b>                                                              |            |                    |         |                                         |         |
| Time (months)                                                                  | 428, 4294  | 0.94 (0.91-0.98)   | <0.001  | 0.97 (0.93-1.01)                        | 0.12    |
| Age                                                                            | 428, 4294  | 0.96 (0.94-0.99)   | 0.002   | 1.00 (0.98-1.03)                        | 0.86    |
| Male                                                                           | 428, 4294  | 1.79 (0.94-3.39)   | 0.07    | 2.14 (1.19-3.87)                        | 0.01    |
| <b>Time-invariant risk factors</b>                                             |            |                    |         |                                         |         |
| Past psychotic disorder diagnosis                                              | 428, 4294  | 14.05 (8.96-22.03) | <0.001  | 18.42 (10.96-30.98)                     | <0.001  |
| THQ score by age 18†                                                           | 420, 4207  | 1.18 (1.07-1.31)   | 0.001   | —                                       | —       |
| Persistent sequelae of traumatic brain injury                                  | 428, 4294  | 1.36 (0.56-3.29)   | 0.49    | —                                       | —       |
| Homelessness by age 18                                                         | 424, 4256  | 1.16 (0.65-2.07)   | 0.62    | —                                       | —       |
| <b>Time-varying risk factors over the first year after entering the study‡</b> |            |                    |         |                                         |         |
| <b>Prior week</b>                                                              |            |                    |         |                                         |         |
| Daily tobacco use                                                              | 415, 3769  | 1.34 (0.81-2.18)   | 0.25    | —                                       | —       |
| Days using alcohol                                                             | 407, 3472  | 0.99 (0.91-1.08)   | 0.82    | 1.01 (0.93-1.09)                        | 0.89    |
| Days using methamphetamine                                                     | 408, 3458  | 1.12 (1.03-1.22)   | 0.01    | 1.12 (1.03-1.22)                        | 0.01    |
| Days using cannabis                                                            | 408, 3460  | 1.05 (0.99-1.11)   | 0.11    | 1.03 (0.98-1.09)                        | 0.25    |
| Days using cocaine                                                             | 408, 3461  | 0.97 (0.92-1.03)   | 0.34    | —                                       | —       |
| Days using opioid                                                              | 408, 3460  | 1.03 (0.97-1.11)   | 0.32    | —                                       | —       |
| <b>Concurrent month of psychosis assessment</b>                                |            |                    |         |                                         |         |
| rTHQ score                                                                     | 410, 3775  | 1.50 (1.16-1.93)   | 0.002   | 1.69 (1.27-2.23)                        | <0.001  |
| Homelessness                                                                   | 428, 4230  | 1.35 (0.65-2.80)   | 0.41    | —                                       | —       |
| Adequate antipsychotic treatment                                               | 427, 4158  | 2.78 (1.76-4.40)   | <0.001  | 2.26 (1.34-3.80)                        | 0.002   |

|                            |           |                  |      |   |   |
|----------------------------|-----------|------------------|------|---|---|
| Adequate methadone therapy | 427, 4147 | 0.90 (0.63-1.30) | 0.58 | — | — |
|----------------------------|-----------|------------------|------|---|---|

Data are odds ratio (OR) and 95% confidence interval (CI). obs = observations, THQ = Trauma History Questionnaire, rTHQ = recent THQ.

\*Adjusted model selected for optimal fit by AIC and likelihood ratio test. Fixed effects are adjusted for the included time-invariant, time-varying factors, and covariates. Random effects (standard deviation): Subject (1.97), Timepoint (0.23).

†Linear effects of THQ scores for number of traumatic events by age 18. Quadratic effects were not significant ( $p > 0.10$ ).

‡Linear effects of number of days of substance use in the week prior to psychosis assessment week, and rTHQ scores for the number of traumatic events (0, 1, or  $\geq 2$ ) in the month concurrent with assessment visit are reported. Quadratic effects were not significant ( $p > 0.10$ ).
