# Supplementary material for: Associations of substance use, psychosis, and mortality among people living in precarious housing or homelessness: A longitudinal, community-based study in Vancouver, Canada
Source: PubMed Central journal article supplement (PMC7337288; doi:10.1371/journal.pmed.1003172), 2020-07-06
Supplement: pmed.1003172.s007.pdf [file pmed.1003172.s007.pdf]

**S6 Table. Testing for reverse association, or a relationship between psychotic features at an assessment visit, and subsequent substance use (in the following week, measured in days) or any subsequent traumatic events (in the following month).**

|                                       | Alcohol use |       | Methamphetamine use |       | Cannabis Use |       | Cocaine Use |       | Any Traumatic Event* |           |
|---------------------------------------|-------------|-------|---------------------|-------|--------------|-------|-------------|-------|----------------------|-----------|
|                                       | Estimate    | SD    | Estimate            | SD    | Estimate     | SD    | Estimate    | SD    | OR                   | 95% CI    |
| Psychotic features without covariates | 0.161       | 0.132 | 0.097               | 0.052 | 0.123        | 0.077 | -0.039      | 0.076 | 1.27‡                | 1.04-1.55 |
| Psychotic features with covariates†   | 0.088       | 0.117 | 0.064               | 0.052 | 0.103        | 0.078 | -0.024      | 0.078 | 1.30‡                | 1.05-1.62 |

Standard deviation (SD), Odds ratio (OR), and 95% confidence interval (CI)  
 N=408, 3451 observations

\*rTHQ score for the following month was dichotomized as experiencing any type of traumatic event. N=403, 3440 observations.

†Covariates included time, age, sex, past psychotic disorder diagnosis, days of other non-prescription substance use in the following week, and, in the following month, adequate antipsychotic treatment, and any type of traumatic event.

‡ $p < 0.05$
