# Supplementary material for: Associations of substance use, psychosis, and mortality among people living in precarious housing or homelessness: A longitudinal, community-based study in Vancouver, Canada
Source: PubMed Central journal article supplement (PMC7337288; doi:10.1371/journal.pmed.1003172), 2020-07-06
Supplement: pmed.1003172.s009.pdf [file pmed.1003172.s009.pdf]

**S8 Table. Screening assessment of risk factors for early mortality with unadjusted Cox proportional hazards regression analyses.**

| Factor                                                 | n   | Hazard ratio<br>(95% CI) | Log-rank<br>p-value | Schoenfeld<br>p-value |
|--------------------------------------------------------|-----|--------------------------|---------------------|-----------------------|
| Psychotic features during first year after study entry | 424 | 0.95 (0.60-1.50)         | 0.82                | 0.02                  |
| Age < 55 years                                         | 310 | 1.44 (0.74-2.80)         | 0.29                | 0.20                  |
| Age ≥ 55 years                                         | 114 | 0.60 (0.30-1.17)         | 0.13                | 0.53                  |
| Past history psychotic disorder                        | 437 | 1.22 (0.77-1.93)         | 0.40                | 0.04                  |
| Age < 55 years                                         | 323 | 2.22 (1.05-4.71)         | 0.04                | 0.27                  |
| Age ≥ 55 years                                         | 114 | 0.76 (0.40-1.43)         | 0.39                | 0.97                  |
| APRI > 0.7                                             | 395 | 2.08 (1.26-3.44)         | 0.004*              | 0.61                  |
| HIV positive                                           | 409 | 2.06 (1.25-3.41)         | 0.005*              | 0.68                  |
| HCV seropositive                                       | 409 | 1.25 (0.71-2.19)         | 0.44                | 0.73                  |
| HCV qPCR positive                                      | 401 | 1.35 (0.83-2.20)         | 0.23                | 0.65                  |
| Daily cigarette smoking                                | 437 | 0.86 (0.44-1.67)         | 0.65                | 0.37                  |
| Alcohol dependence past                                | 436 | 1.36 (0.86-2.15)         | 0.19                | 0.31                  |
| Alcohol dependence baseline                            | 437 | 2.14 (1.32-3.47)         | 0.002*              | 0.85                  |
| Cocaine dependence past                                | 436 | 0.94 (0.52-1.70)         | 0.83                | 0.35                  |
| Cocaine dependence baseline                            | 437 | 1.26 (0.72-2.22)         | 0.42                | 0.98                  |
| Methamphetamine dependence past                        | 437 | 0.93 (0.55-1.56)         | 0.78                | 0.71                  |
| Methamphetamine dependence baseline                    | 437 | 1.03(0.56-1.87)          | 0.93                | 0.34                  |
| Opioid dependence past                                 | 437 | 0.92 (0.58-1.47)         | 0.73                | 0.63                  |
| Opioid dependence baseline                             | 436 | 0.90 (0.56-1.44)         | 0.66                | 0.13                  |
| Cannabis dependence past                               | 437 | 0.84 (0.52-1.35)         | 0.46                | 0.49                  |
| Cannabis dependence baseline                           | 437 | 0.77 (0.46-1.30)         | 0.33                | 0.22                  |
