# Supplementary material for: Associations of substance use, psychosis, and mortality among people living in precarious housing or homelessness: A longitudinal, community-based study in Vancouver, Canada
Source: PLoS Med. 2020 Jul 6;17(7):e1003172. doi: 10.1371/journal.pmed.1003172 (PMC7337288; doi:10.1371/journal.pmed.1003172)
Supplement: S7 Table — (PDF) [file pmed.1003172.s008.pdf]

**S7 Table. Effects of risk factors on odds of observing psychotic features during the first year after study entry by multiple imputation approach.**

|                                                 | <b>Adjusted*</b><br><b>(n=437, 56,810 observations)</b> |                |
|-------------------------------------------------|---------------------------------------------------------|----------------|
|                                                 | <b>OR (95% CI)</b>                                      | <b>P-Value</b> |
| <b>Covariates</b>                               |                                                         |                |
| Time (months)                                   | 0.97 (0.94-1.00)                                        | 0.03           |
| Age                                             | 1.00 (0.99-1.02)                                        | 0.87           |
| Male                                            | 1.47 (1.02-2.12)                                        | 0.04           |
| <b>Time-invariant risk factors</b>              |                                                         |                |
| Past psychotic disorder diagnosis               | 9.89 (7.17-13.63)                                       | <0.001         |
| THQ score by age 18                             | —                                                       | —              |
| Persistent sequelae of traumatic brain injury   | —                                                       | —              |
| Homelessness by age 18                          | —                                                       | —              |
| <b>Time-varying risk factors</b>                |                                                         |                |
| <b>Concurrent week of psychosis assessment</b>  |                                                         |                |
| Daily tobacco use                               | —                                                       | —              |
| Days using alcohol                              | 1.07 (1.00-1.14)                                        | 0.04           |
| Days using methamphetamine                      | 1.14 (1.07-1.22)                                        | <0.001         |
| Days using cannabis                             | 1.08 (1.03-1.13)                                        | 0.003          |
| Days using cocaine                              | —                                                       | —              |
| Days using opioid                               | —                                                       | —              |
| <b>Concurrent month of psychosis assessment</b> |                                                         |                |
| rTHQ score                                      | 1.58 (1.27-1.97)                                        | <0.001         |
| Homelessness                                    | —                                                       | —              |
| Adequate antipsychotic treatment                | 2.20 (1.55-3.13)                                        | <0.001         |
| Adequate methadone therapy                      | —                                                       | —              |

Data are odds ratio (OR) and 95% confidence interval (CI). THQ = Trauma History Questionnaire, rTHQ = recent THQ.

\*Adjusted for all fixed and current risk factors, and covariates included.
